# Supplementary material for: Patient iPSC-Derived Macrophages to Study Inborn Errors of the IFN-γ Responsive Pathway
Source: PubMed Central journal article supplement (PMC7072779; doi:10.3390/cells9020483), 2020-02-19

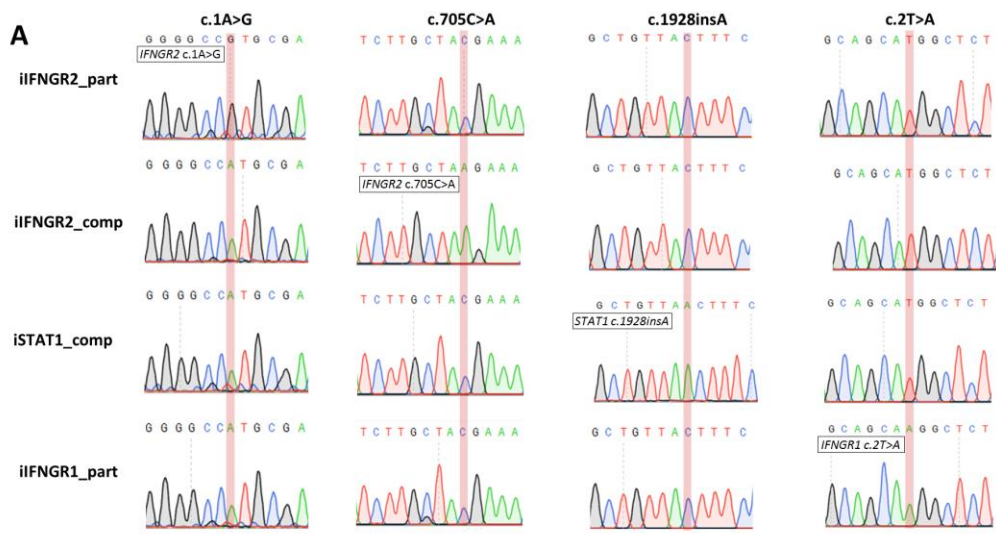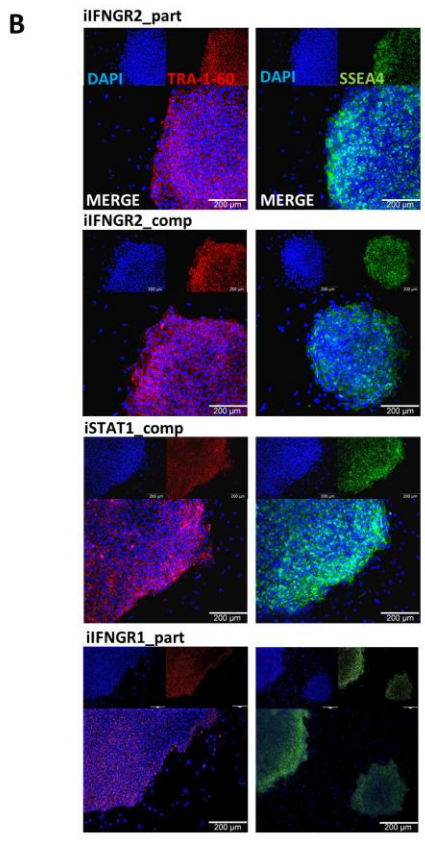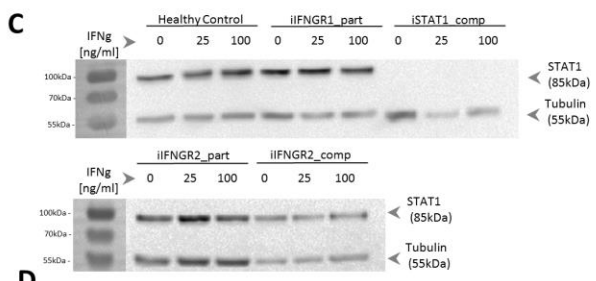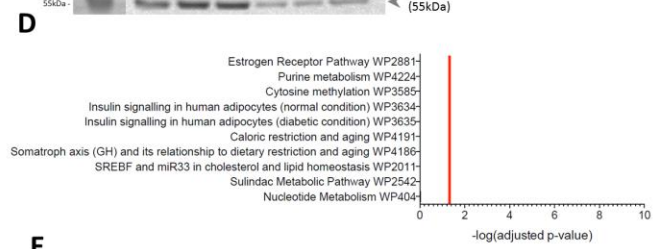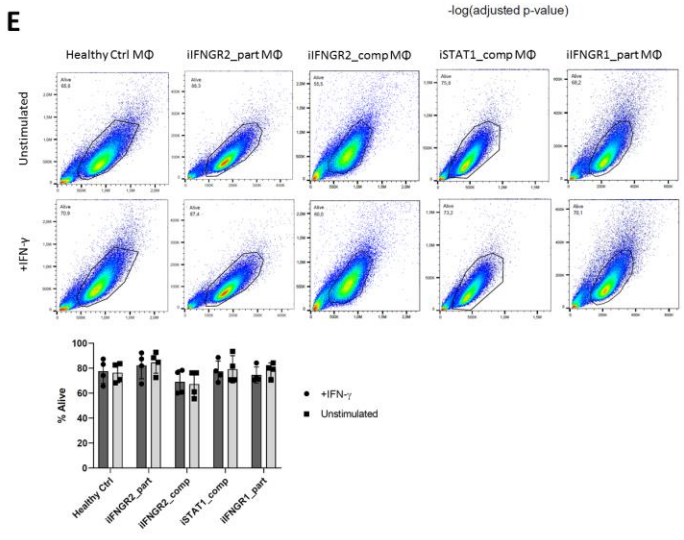

Supplement: cells-09-00483-s001.pdf [file cells-09-00483-s001.pdf]
